# Supplementary material for: Tuberculosis in the time of COVID-19: quality of life and digital innovation
Source: PubMed Central journal article supplement — Eur Respir J. 2020 Aug 6;56(2):2001998. doi: 10.1183/13993003.01998-2020 (PMC7278505; doi:10.1183/13993003.01998-2020), 2020-08-06
Supplement: ERJ-01998-2020.Shareable.pdf [file ERJ-01998-2020.Shareable.pdf]

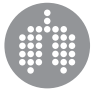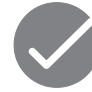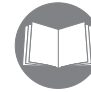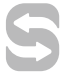

SHAREABLE PDF

# Tuberculosis in the time of COVID-19: quality of life and digital innovation

Dina Visca <sup>1,2</sup>, Simon Tiberi <sup>3,4</sup>, Emanuele Pontali<sup>5</sup>, Antonio Spanevello<sup>1,2</sup> and Giovanni Battista Migliori <sup>6</sup>

**Affiliations:** <sup>1</sup>Division of Pulmonary Rehabilitation, Istituti Clinici Scientifici Maugeri, IRCCS, Tradate, Italy. <sup>2</sup>Dept of Medicine and Surgery, Respiratory Diseases, University of Insubria, Tradate, Italy. <sup>3</sup>Dept of Infection, Royal London and Newham University Hospitals, Barts Health NHS Trust, London UK. <sup>4</sup>Blizard Institute, Barts and the London School of Medicine and Dentistry, Queen Mary University of London, London UK. <sup>5</sup>Dept of Infectious Diseases, Galliera Hospital, Genoa, Italy. <sup>6</sup>Servizio di Epidemiologia Clinica delle Malattie Respiratorie, Istituti Clinici Scientifici Maugeri IRCCS, Tradate, Italy.

**Correspondence:** Giovanni Battista Migliori, Servizio di Epidemiologia Clinica delle Malattie Respiratorie, Istituti Clinici Scientifici Maugeri IRCCS, Via Roncaccio 16, Tradate, Varese, 21049, Italy. E-mail: giovannibattista.migliori@icsmaugeri.it

@ERSpublications

**COVID-19 affects healthy individuals, patients and healthcare professionals, as well as tuberculosis services. The importance of digital technologies and the impact on quality of life are discussed.** <https://bit.ly/2U8nA0h>

**Cite this article as:** Visca D, Tiberi S, Pontali E, *et al.* Tuberculosis in the time of COVID-19: quality of life and digital innovation. *Eur Respir J* 2020; 56: 2001998 [<https://doi.org/10.1183/13993003.01998-2020>].

This single-page version can be shared freely online.

The year 2020 will be remembered as the year coronavirus disease 2019 (COVID-19) swept the world and overwhelmed healthcare systems, demonstrating several vulnerabilities and a lack of capacity.
